# Supplementary material for: Bidirectional Modulation of Neuronal Cells Electrical and Mechanical Properties Through Pristine and Functionalized Graphene Substrates
Source: Frontiers journal article supplement (doi:10.3389/fnins.2021.811348), 2022-01-11
Supplement: Table_1.pdf [file Table_1.pdf]

**Table S1**

| Sample | $I_D/I_G$ |      | $\Delta I_D/I_G$ | $nD$ (cm <sup>-2</sup> ) |
|--------|-----------|------|------------------|--------------------------|
|        | pSLG      | fSLG |                  |                          |
| 1      | 0.04      | 0.33 | 0.29             | 6.52×10 <sup>10</sup>    |
| 2      | 0.05      | 0.23 | 0.18             | 4.04×10 <sup>10</sup>    |
| 3      | 0.03      | 0.19 | 0.16             | 3.60×10 <sup>10</sup>    |
| 4      | 0.03      | 0.23 | 0.20             | 4.49×10 <sup>10</sup>    |
| 5      | 0.08      | 0.15 | 0.07             | 1.57×10 <sup>10</sup>    |
| 6      | 0.05      | 0.32 | 0.27             | 6.07×10 <sup>10</sup>    |

**Table S1.** The table summarizes the  $I_D/I_G$  ratio for pSLG and fSLG, and defect density for fSLG. Values are relative to six graphene samples and represent measurements performed before the chemical functionalization (pSLG, grey column) and after (fSLG, red column).
